# Supplementary material for: Effect of an Environment Friendly Heat and Relative Humidity Approach on γ-Aminobutyric Acid Accumulation in Different Highland Barley Cultivars
Source: MDPI journal article supplement (doi:10.3390/foods11050691), 2022-02-25
Supplement: s1 [file s1]

**Table S1.** Description of highland barley cultivars.

| Symbol | Cultivar | Seed color | Row type | Symbol | Cultivar | Seed color | Row type |
|--------|----------|------------|----------|--------|----------|------------|----------|
| YT1    | QTB13    | Yellow     | Two-row  | PS1    | GMZ      | Purple     | Six-row  |
| YT2    | QTB25    | Yellow     | Two-row  | PS2    | LZH      | Purple     | Six-row  |
| YT3    | 1127     | Yellow     | Two-row  | PS3    | LZZ      | Purple     | Six-row  |
| YT4    | 1128     | Yellow     | Two-row  | PS4    | XZDM5658 | Purple     | Six-row  |
| YS1    | ZQ25     | Yellow     | Six-row  | PS5    | XZDM5191 | Purple     | Six-row  |
| YS2    | XL22     | Yellow     | Six-row  | PS6    | XZDM5122 | Purple     | Six-row  |
| YS3    | ZQ2000   | Yellow     | Six-row  | PS7    | XZDM5633 | Purple     | Six-row  |
| YS4    | ZQ320    | Yellow     | Six-row  | PS8    | XZDM5505 | Purple     | Six-row  |
| YS5    | ZQ13     | Yellow     | Six-row  | PS9    | XZDM5230 | Purple     | Six-row  |
| YS6    | ZQ27     | Yellow     | Six-row  | PS10   | XZDM5532 | Purple     | Six-row  |
| YS7    | XZDM4630 | Yellow     | Six-row  | PS11   | XZDM327  | Purple     | Six-row  |
| YS8    | XZDM4438 | Yellow     | Six-row  | PS12   | XZDM339  | Purple     | Six-row  |
| YS9    | XZDM4550 | Yellow     | Six-row  |        |          |            |          |

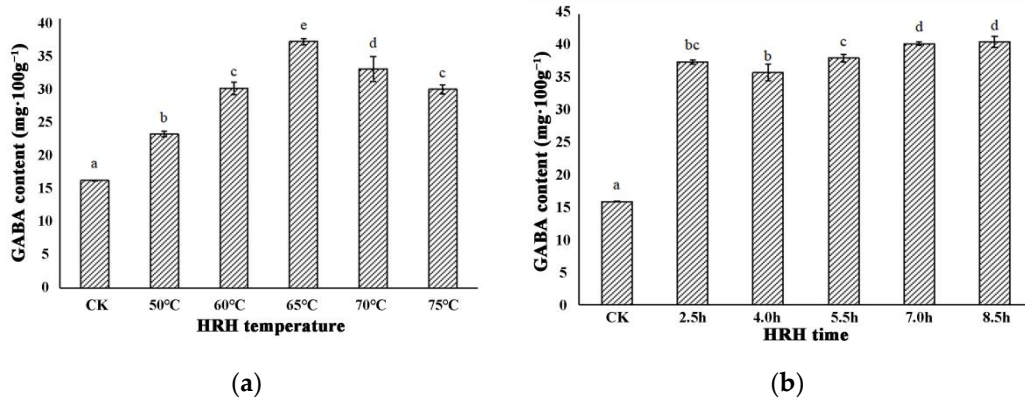

**Figure S1.** Effect of heat and relative humidity (HRH) treatment on GABA content. (a) The effect of HRH temperature on GABA content; (b) the effect of HRH time on GABA content. Different letters denote significant difference among different HRH treatment conditions at the level  $p < 0.05$ . According to the capacity and efficiency of GABA accumulation, 65°C and 2.5h were used as the treatment condition in this experiment.
